# Supplementary material
Source: MDPI journal article supplement (https://www.mdpi.com/2673-3293/3/4/49)
Supplement: s1 [file s1]

**Table S1.** Statistical comparison of new voltammetric method against a reference method for Hg (II) analysis in chlor-alkali industrial effluent.

| Statistical parameters                   |                    | Reference method | New method | Reference verses new method       |
|------------------------------------------|--------------------|------------------|------------|-----------------------------------|
| Pearson coefficient                      |                    |                  |            | 1.00                              |
| Is relationship significant?             |                    |                  |            | Yes                               |
| Regression method                        |                    |                  |            | Weighted Deming linear regression |
| Slope(a)<br>Intercept(b)                 |                    |                  |            | a = 1.0006<br>b = -0.02           |
| Skewness                                 | Statistic          | 0.36             | 0.37       |                                   |
|                                          | Standard error     | 0.51             | 0.51       |                                   |
| Kurtosis                                 | Statistic          | -0.83            | 0.99       |                                   |
|                                          | Standard error     | -0.82            | 0.99       |                                   |
| Shapiro-Wilk                             | P-value            | 0.46             | 0.43       |                                   |
| Paired Differences                       | Mean               |                  |            | -0.013                            |
|                                          | Standard deviation |                  |            | 0.12                              |
| Calculated t value                       |                    |                  |            | -0.49                             |
| Tabulated t value                        |                    |                  |            | 2.09                              |
| Degree of freedom (df)                   |                    |                  |            | 19                                |
| P-value for paired t test                |                    |                  |            | 0.62                              |
| Relative standard deviation (RSD)%       |                    | 0.17             | 0.19       |                                   |
| Median relative error (MRE)%             |                    |                  |            | -1.75 to 0.02                     |
| Root mean square error (RMSE)            |                    |                  |            | 0.12                              |
| Predicted residual sum of square (PRESS) |                    |                  |            | 0.99                              |

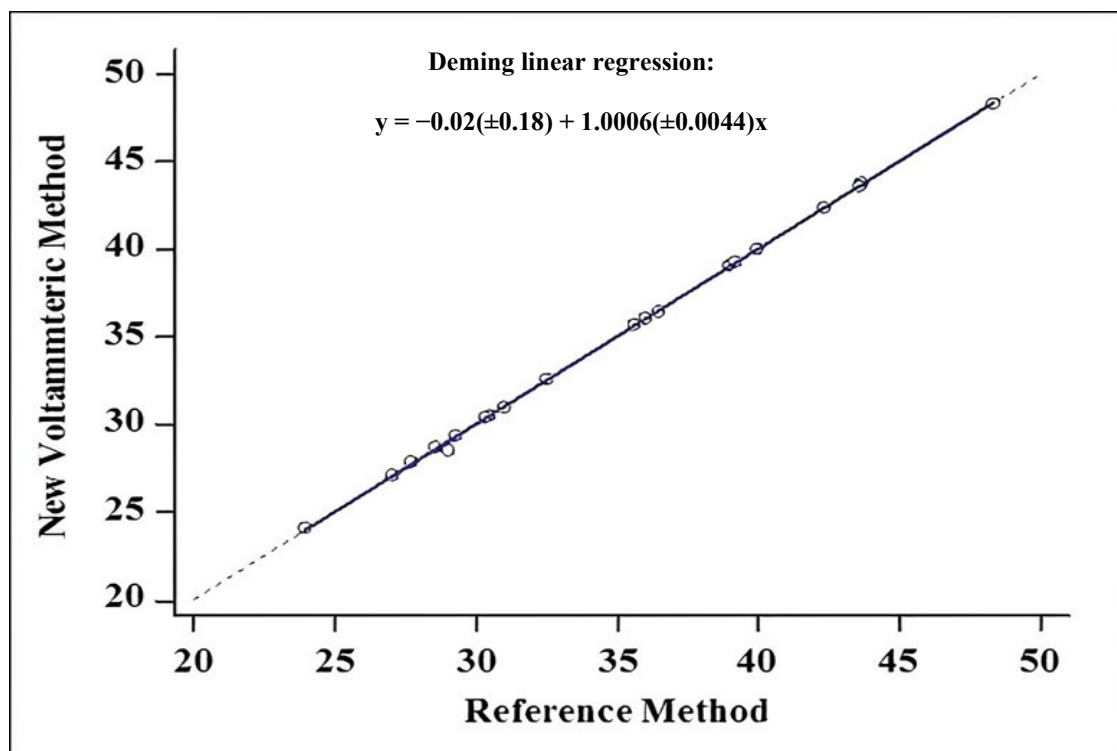

**Figure S1.** Weighted Deming regression plot between the new voltammetric and reference method.

Deming linear regression:  
 $y = -0.02(\pm 0.18) + 1.0006(\pm 0.0044)x$
